# Supplementary material for: Dietary supplementation of porcine bile acids improves laying performance, serum lipid metabolism and cecal microbiota in late-phase laying hens
Source: PubMed Central journal article supplement — Anim Nutr. 2022 Aug 14;11:283–92. doi: 10.1016/j.aninu.2022.08.003 (PMC9576542; doi:10.1016/j.aninu.2022.08.003), 2022-08-14
Supplement: mmc1.pdf [file mmc1.pdf]

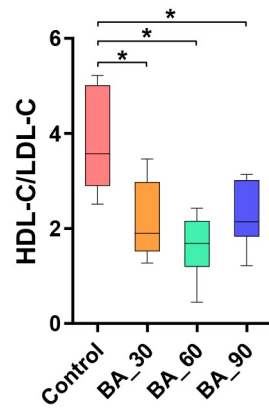

**Fig. S1** Effects of dietary porcine bile acids supplementation on serum high-density lipoprotein cholesterol to low-density lipoprotein cholesterol ratio of laying hens. BA = bile acid; HDL-C = high-density lipoprotein cholesterol; LDL-C = low-density lipoprotein cholesterol. Each box represents the mean value of 6 hens each treatment ( $n = 6$ ). Whiskers represent maximum and minimum. \*,  $P < 0.05$ .

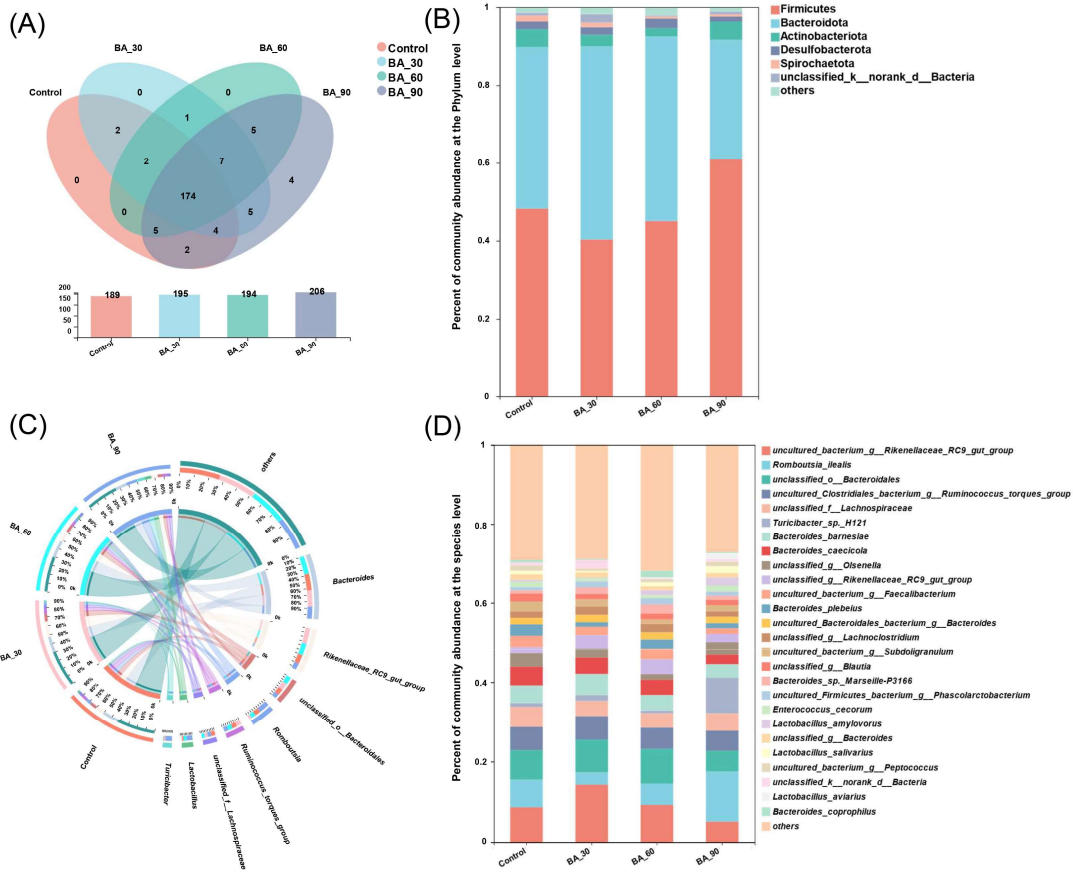

**Fig. S2** Effects of dietary porcine bile acids supplementation on cecal microbiota compositions of laying hens. BA = bile acid. (A) Venn diagram at the genus level. (B) Percent of community abundance at the phylum level. (C) Circos diagram at the genus level. The outer color band represents microbiota, the inner color band represents different treatments, and the length represents the distribution proportion of the sample in a certain kind of bacteria. (D) Percent of community abundance at the species level.
